# Supplementary material
Source: publisher site journal article supplement (https://www.dovepress.com/article/481871)
Supplement: Supplementary file 1 [file get_supplementary_file.php]

### Supplementary Information


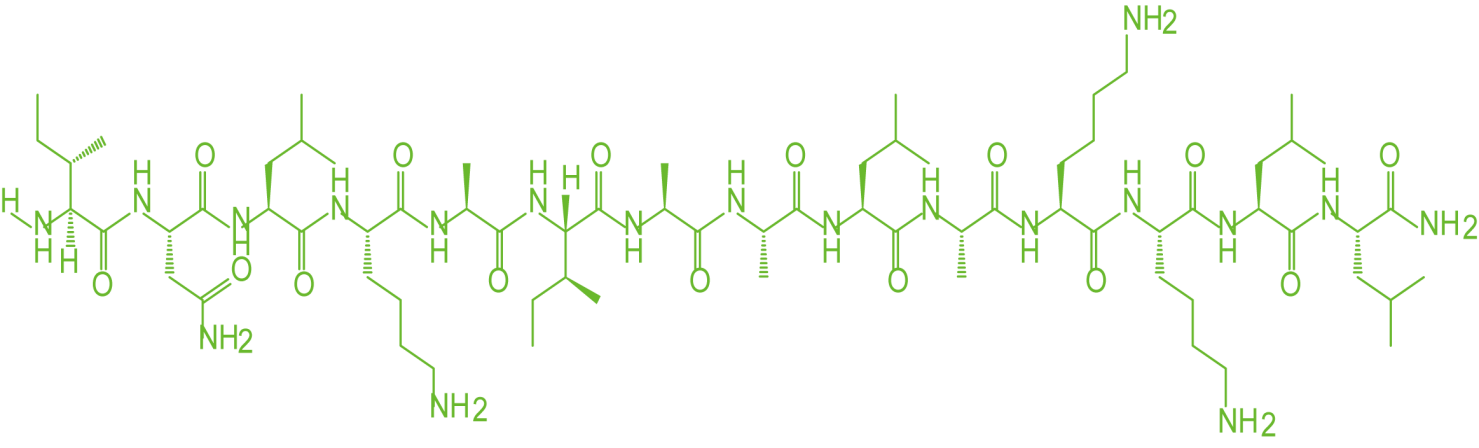


**Figure S1.** Chemical structure of Mast-M.


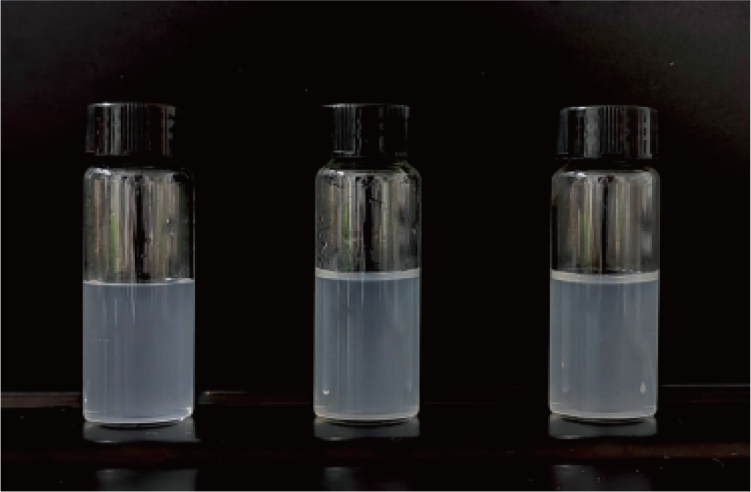


**Figure S2.** The general properties of Phy-Mast-M.


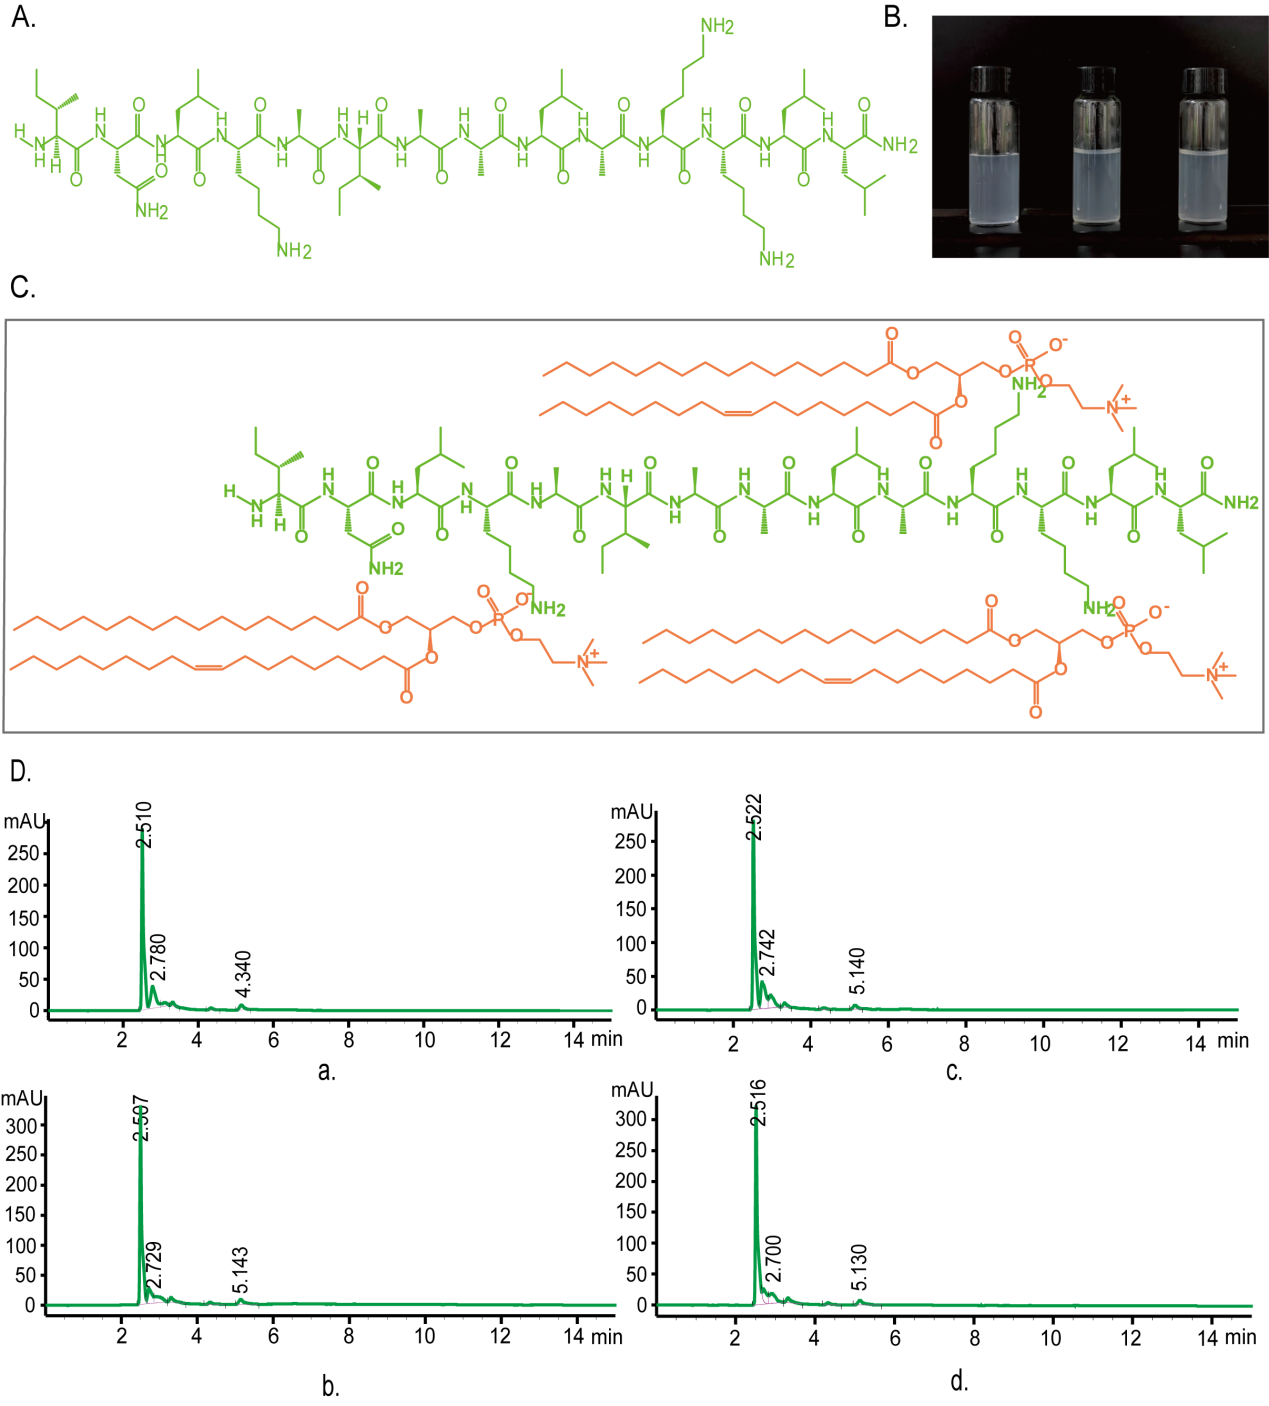


**Figure S3.** Mast-M is chemically bound to SPC.


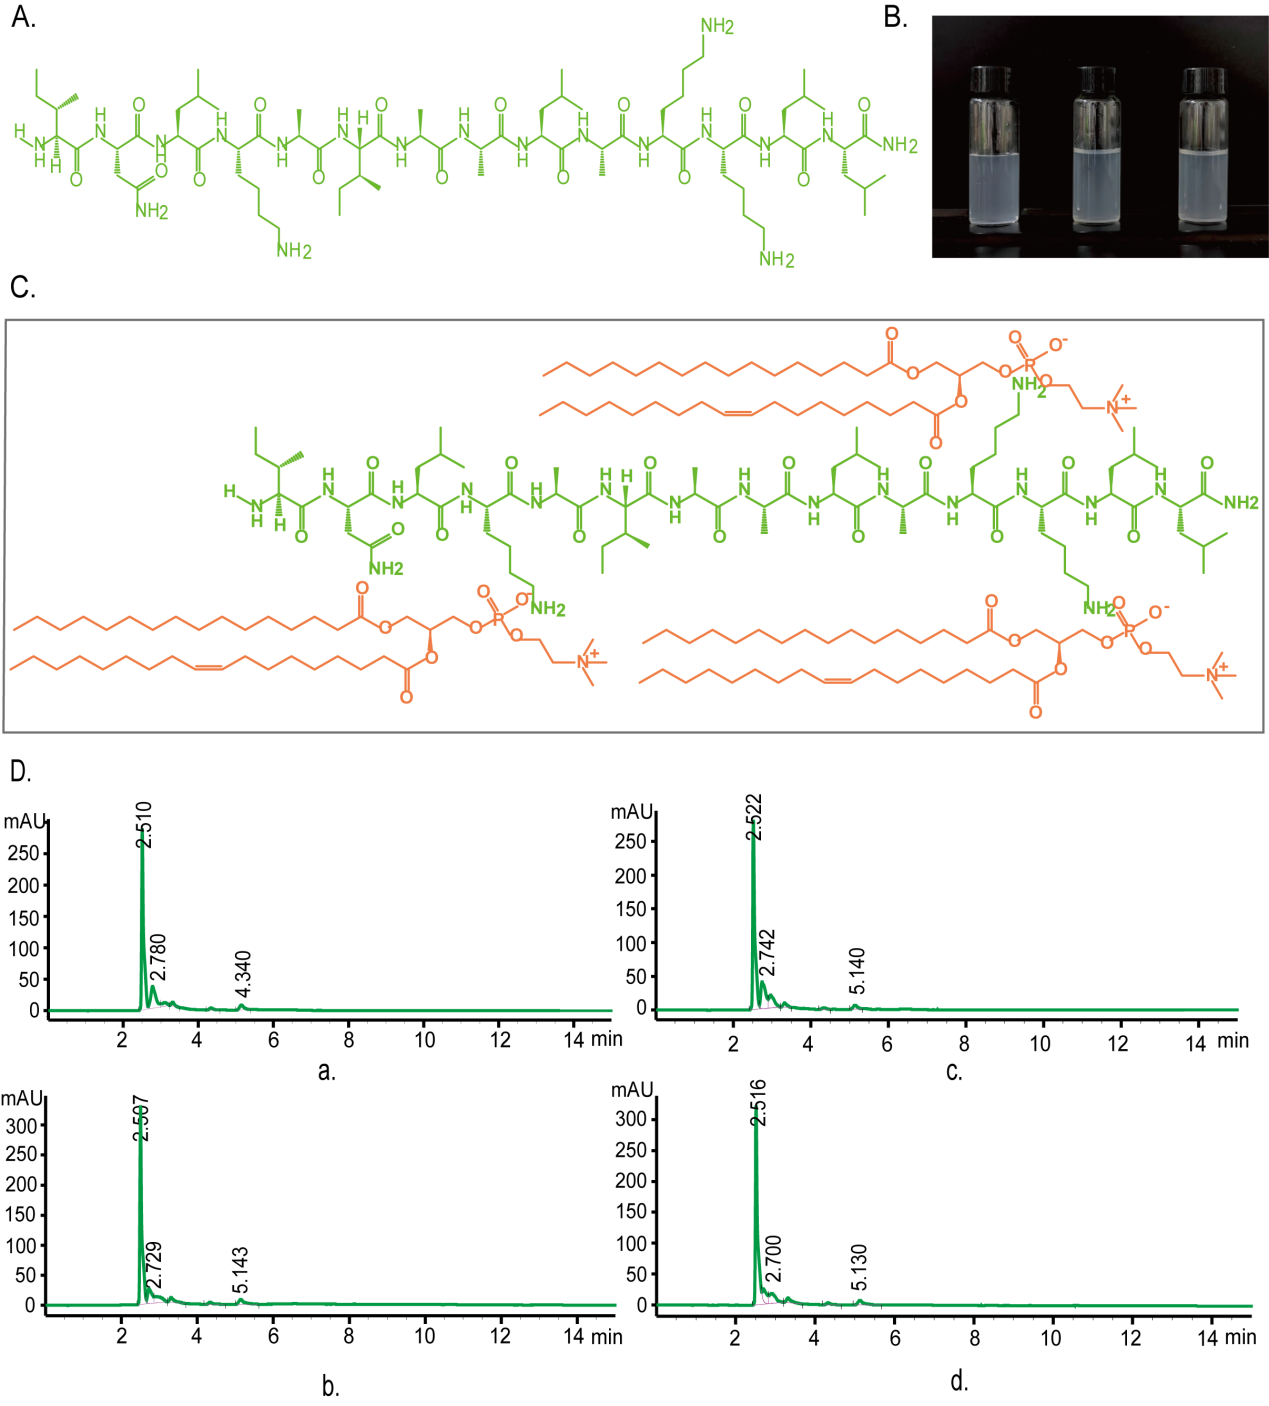


**Figure S4.** Phy-Mast-M content detection at different time points using HPLC (a: 1d, b: 7d, c: 14d, d: 28d)


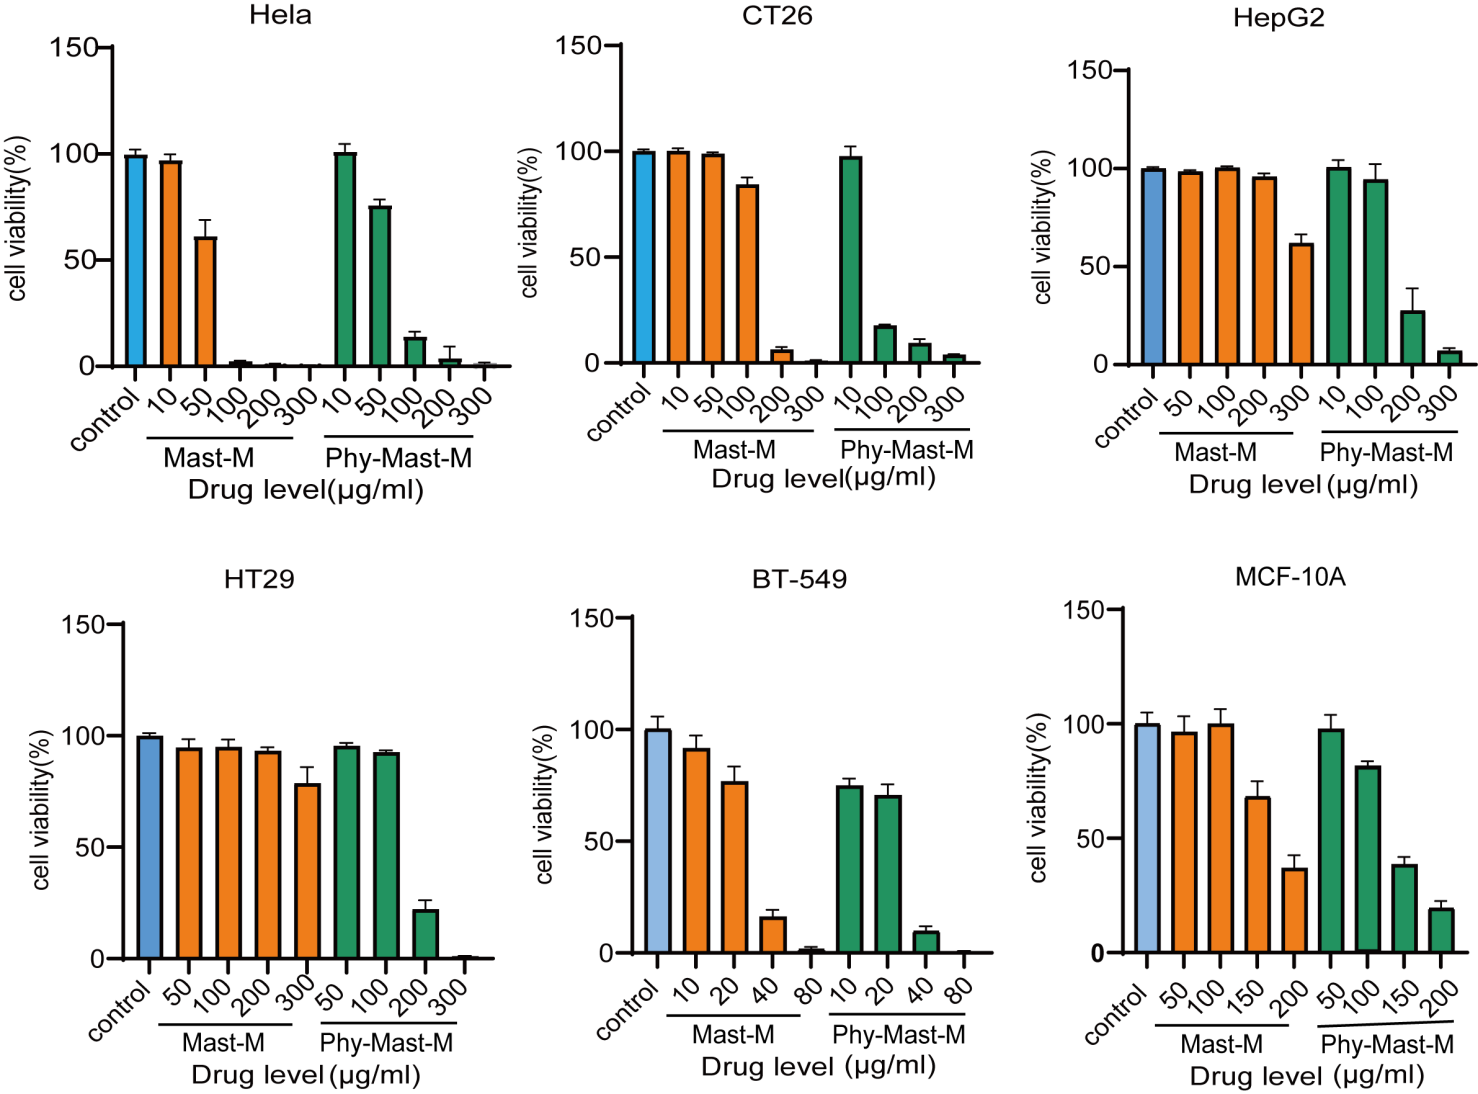


**Figure S5.** CCK-8 detection. (*n*= 6)


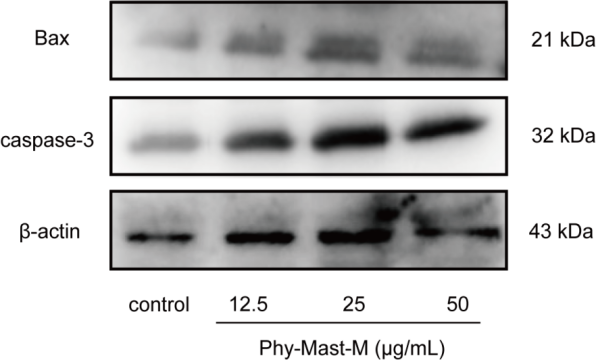


**Figure S6.** Representative western blots depicting apoptosis levels.


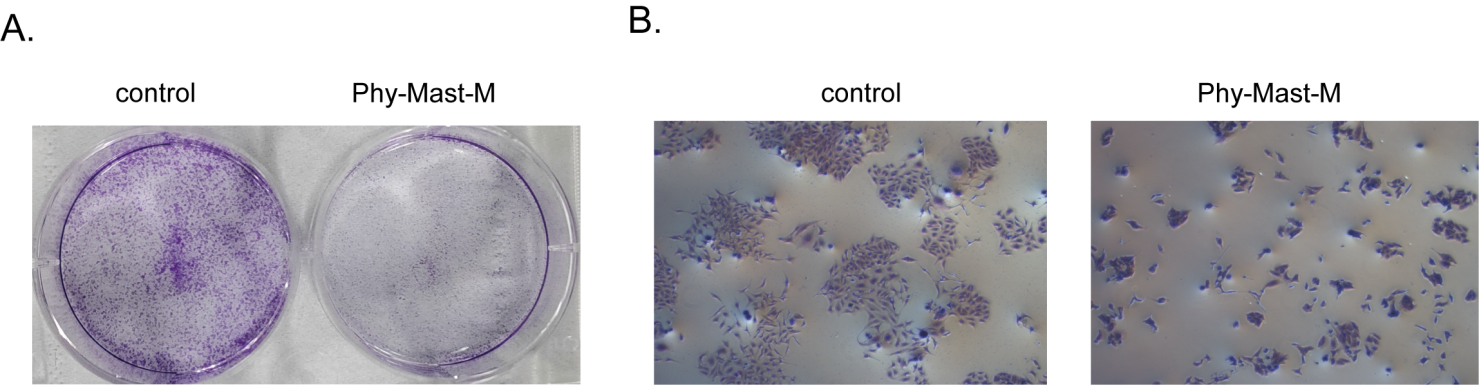


**Figure S7.** (A). Plate cloning of MDA-MB-231 cells. (B). Cell cloning microscopic.


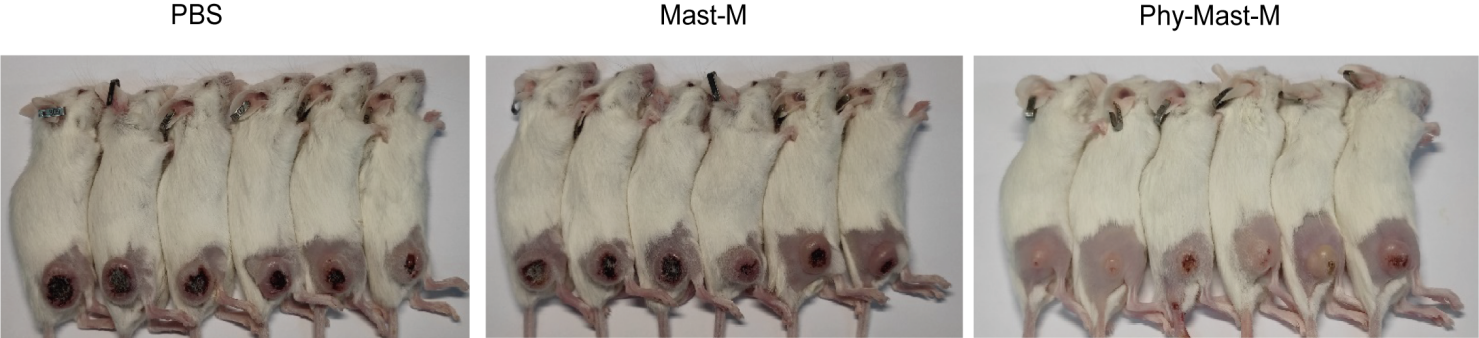


**Figure S8.** The effect of drug therapy on tumor-bearing mice. (*n*= 6)
